# Supplementary material for: Proinflammatory Differentiation of Macrophages Through Microparticles That Form Immune Complexes Leads to T- and B-Cell Activation in Systemic Autoimmune Diseases
Source: PubMed Central journal article supplement (PMC6724570; doi:10.3389/fimmu.2019.02058), 2019-08-28
Supplement: Image_1.pdf [file Image_1.pdf]

## Supplementary Information

### **Proinflammatory differentiation of macrophages through microparticles that form immune complexes leads to T- and B-cell activation in systemic autoimmune diseases**

Catalina Burbano<sup>1,2</sup>, Juan Villar-Vesga<sup>1</sup>, Gloria Vásquez<sup>1</sup>, Carlos Muñoz-Vahos<sup>3</sup>, Mauricio Rojas<sup>1,2</sup>, Diana Castaño<sup>1\*</sup>

<sup>1</sup> Grupo de Inmunología Celular e Inmunogenética, Instituto de Investigaciones Médicas, Facultad de Medicina, Universidad de Antioquia UdeA, Medellín, Colombia

<sup>2</sup> Unidad de Citometría de Flujo, Sede de Investigación Universitaria, Universidad de Antioquia UdeA, Medellín, Colombia

<sup>3</sup>Sección de Reumatología. Hospital Universitario de San Vicente Fundación. Medellín, Colombia

\*Correspondence: DC [diana.castano@udea.edu.co](mailto:diana.castano@udea.edu.co)

**Supplementary Table 1.** Phenotypic characteristics of MP from patients with RA and SLE.

| Characteristic*                   | RA                                      |                                           | SLE                                       |                                           |
|-----------------------------------|-----------------------------------------|-------------------------------------------|-------------------------------------------|-------------------------------------------|
|                                   | RMP                                     | RMP-IC                                    | LMP                                       | LMP-IC                                    |
| Count (MP/mL)                     | <b>711 136</b><br>(435 816 - 9 542 616) | <b>1 101 600</b><br>(220 600 - 6 804 485) | <b>1 049 375</b><br>(294 675 - 9 002 690) | <b>1 284 875</b><br>(213 420 - 7 674 235) |
| % of CD41a+ (platelets marker)    | <b>62.55</b> (34.6 - 87.3)              | <b>45.9</b> (13.7 - 94)                   | <b>19.9</b> (16.5 - 60.2)                 | <b>44.05</b> (13.3 - 74.6)                |
| % of CD45+ (Leukocyte marker)     | <b>40.65</b> (17.4 - 64.6)              | <b>35.2</b> (5.08 - 62.1)                 | <b>21.7</b> (19.1 - 29.2)                 | <b>34.5</b> (13.1 - 68.7)                 |
| % of CD105+ (Endothelial marker)  | <b>3.35</b> (1.48 - 18.2)               | <b>4.66</b> (0.36 - 26.6)                 | <b>9.15</b> (4.01 - 14.3)                 | <b>5.14</b> (1.64 - 23.6)                 |
| % of CD235a+ (Erythrocyte marker) | <b>7.03</b> (4.96 - 8.94)               | <b>7.91</b> (0.58 - 19.5)                 | <b>7.08</b> (6.77 - 7.4)                  | <b>8.08</b> (1.57 - 21.6)                 |
| % of HLA-DR+                      | <b>43.6</b> (19 - 65.2)                 | <b>39.1</b> (0.74 - 77.9)                 | <b>28.7</b> (16.4 - 38.6)                 | <b>39.1</b> (9.24 - 73.8)                 |
| % of Annexin V+                   | <b>43.2</b> (16.6 - 54.5)               | <b>42.4</b> (9.1 - 80.6)                  | <b>36.6</b> (11.4 - 56.6)                 | <b>34.4</b> (2.26 - 91.8)                 |
| % of DNA+                         | <b>2.8</b> (0.5 - 6)                    | <b>1.6</b> (0 - 24.3)                     | <b>0.5</b> (0 - 3.5)                      | <b>1.2</b> (0 - 18)                       |
| % of RNA+                         | <b>5.55</b> (1 - 6.8)                   | <b>2.2</b> (0 - 15.7)                     | <b>4</b> (0 - 5.5)                        | <b>2</b> (0 - 17.3)                       |
| % of HMGB1+                       | <b>12.21</b> (0.93 - 50.7)              | <b>9.85</b> (1.57 - 63.1)                 | <b>22.5</b> (1.09 - 30.8)                 | <b>14.9</b> (1.6 - 66.3)                  |
| % of Citrulline+                  | <b>12.1</b> (3.85 - 41.97)              | <b>11.49</b> (2.5 - 71.88)                | <b>9.52</b> (6.78 - 16.82)                | <b>7.33</b> (0 - 38.07)                   |
| % of IgG+                         | <b>3.77</b> (1.58 - 6.03)               | <b>20.1</b> (6.19 - 71.2)                 | <b>4.51</b> (0.82 - 5.77)                 | <b>29.7</b> (9.52 - 93)                   |
| % of IgM+                         | <b>16.7</b> (10.4 - 39.7)               | <b>25.2</b> (2.13 - 79.4)                 | <b>35.9</b> (25.4 - 58.9)                 | <b>40.4</b> (4.25 - 91.8)                 |

\***Median** (minimum-maximum range).  
RMP and LMP were defined as <6.05% MP-IgG+  
RMP-IC were defined as >28.45% MP-IgG+  
LMP-IC were defined as >38.85% MP-IgG+

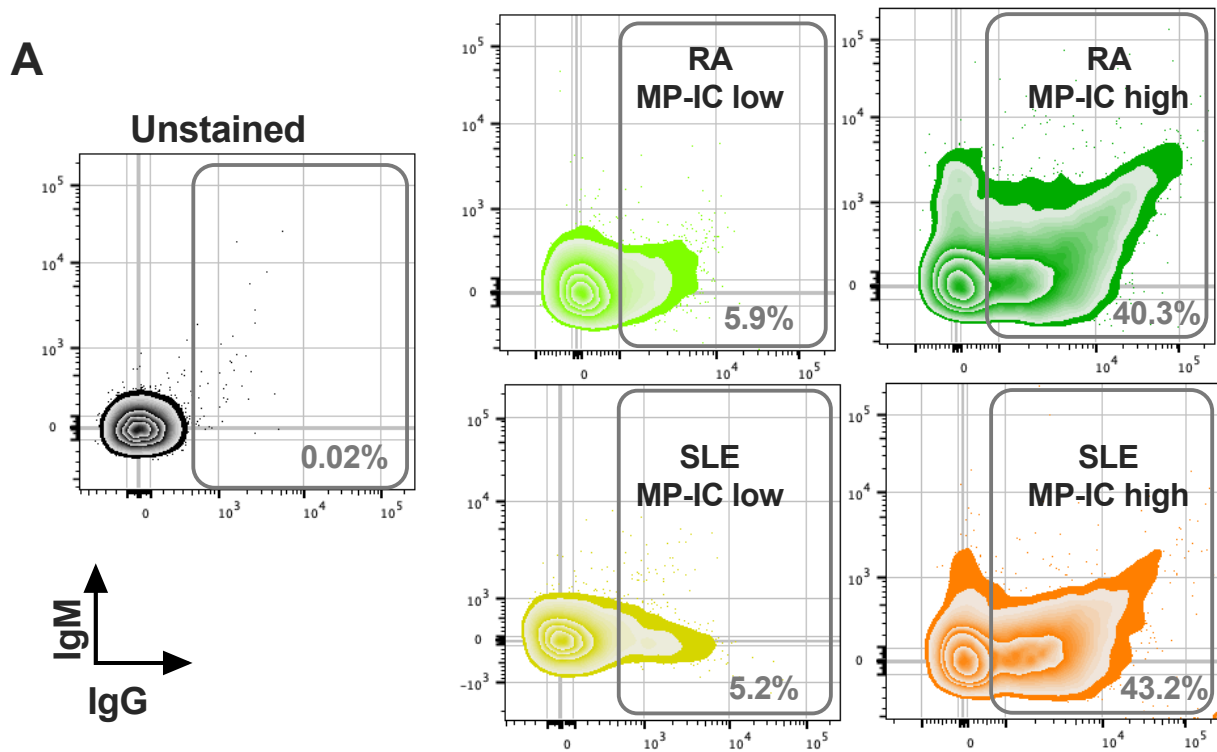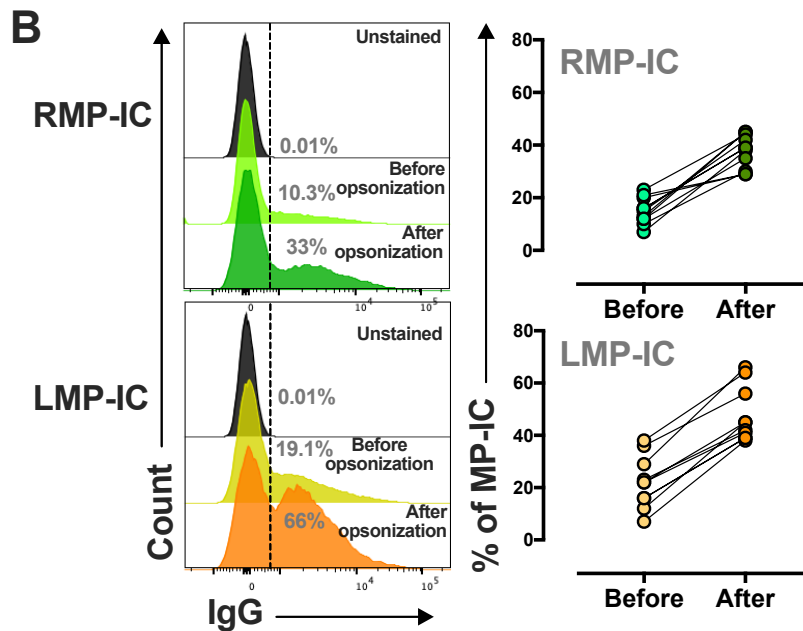

**Supplementary Figure 1. MP-IC from RA and SLE patients.** **A.** Representative density plots that show IgM and IgG content on MP from patients with RA and SLE that were included in the MP batches; *ex vivo* unstained and stained MPs with specific *F(ab)2* fractions against IgG and IgM are shown before their storage at  $-70^{\circ}\text{C}$ . These RA and SLE patients belong to previously published cohorts by our group (Burbano et al, Front. Immunol. 9, 2018 and Burbano et al Sci. Rep. 8, 2018). **B.** Because the frequency of MP-IC decreased after these vesicles were thaw, *in vitro* opsonization of MPs with IgG from patients was performed.



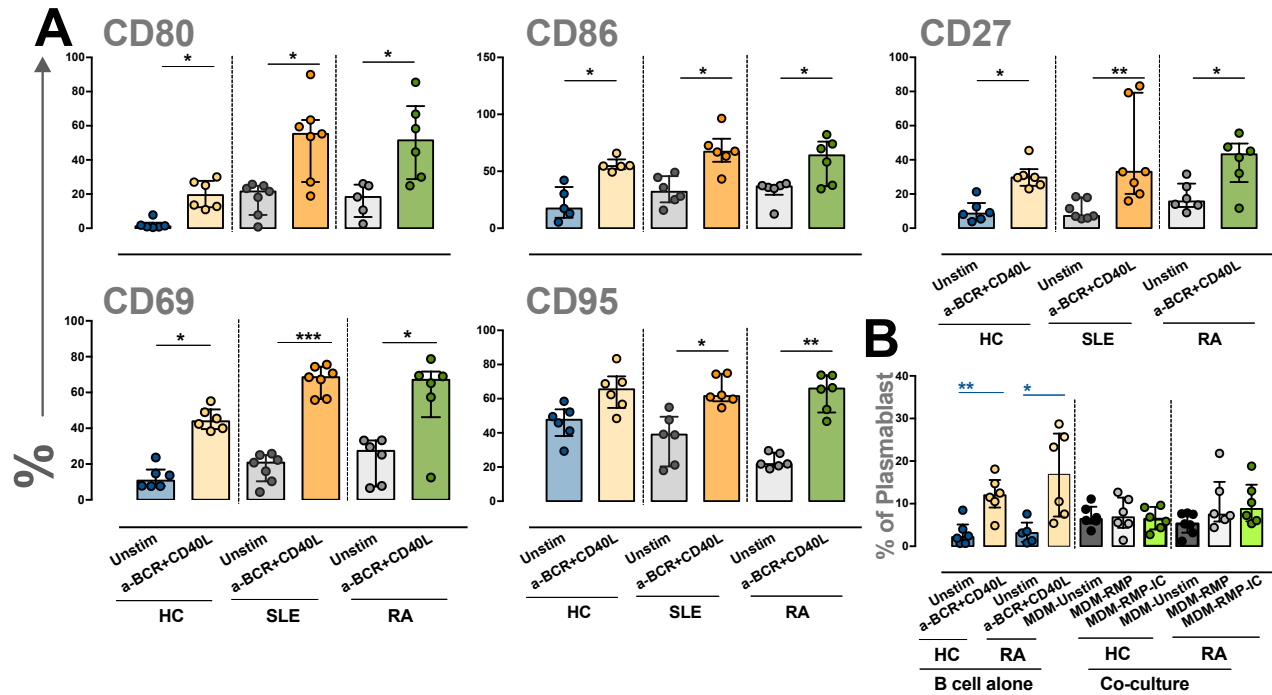

**Supplementary Figure 3. B cells from patients with SLE and RA and HCs respond to conventional stimuli.** **A.** The frequency of CD80, CD86, CD69 and CD95 in B cells from patients with SLE and RA and HCs ( $n = 6$ , each) that were cultured alone (Unstim, complete medium) or stimulated with anti-BCR plus CD40L. Comparisons among the groups were performed using the Kruskal–Wallis test and Dunn’s *post-hoc* test. **B.** The frequency of plasmablasts in B cells cultured alone (Unstim, complete medium) or stimulated with anti-BCR + CD40L and in B cells co-cultured with MDMs differentiated without (Unstim, complete medium) or with RMPs or RMP-ICs from patients with RA ( $n = 7$ ) and HCs ( $n = 6$ ). Comparisons among the groups were performed using ANOVA II and the Bonferroni *post-hoc* test.

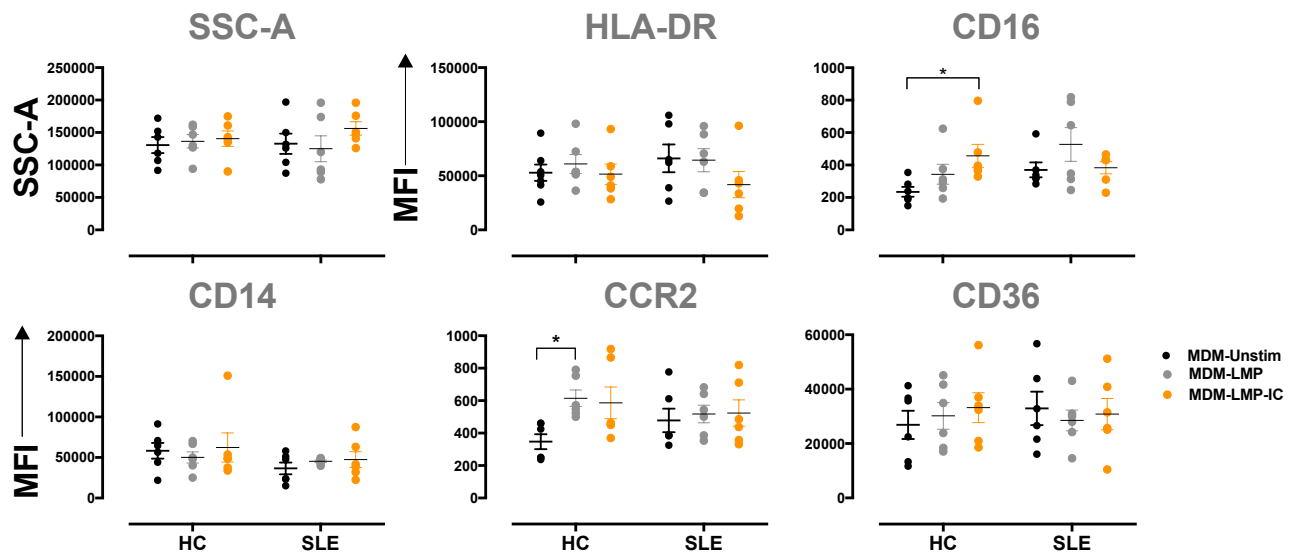

**Supplementary Figure 4. MPs and MP-ICs from patients with SLE do not alter the expression of markers for MDM differentiation in macrophages from patients with SLE.** The MFI of markers associated with the differentiation of mononuclear phagocytes, SSC-A, HLA-DR, CD16, CCR2 and CD36, on differentiated MDMs without (Unstimulated: Unstim, black dots) or with LMPs (dark grey dots) or LMP-ICs (orange dots) from HCs (n = 6) and patients with SLE (n = 6). Comparisons among the groups were performed using ANOVA II and the Bonferroni *post-hoc* test.

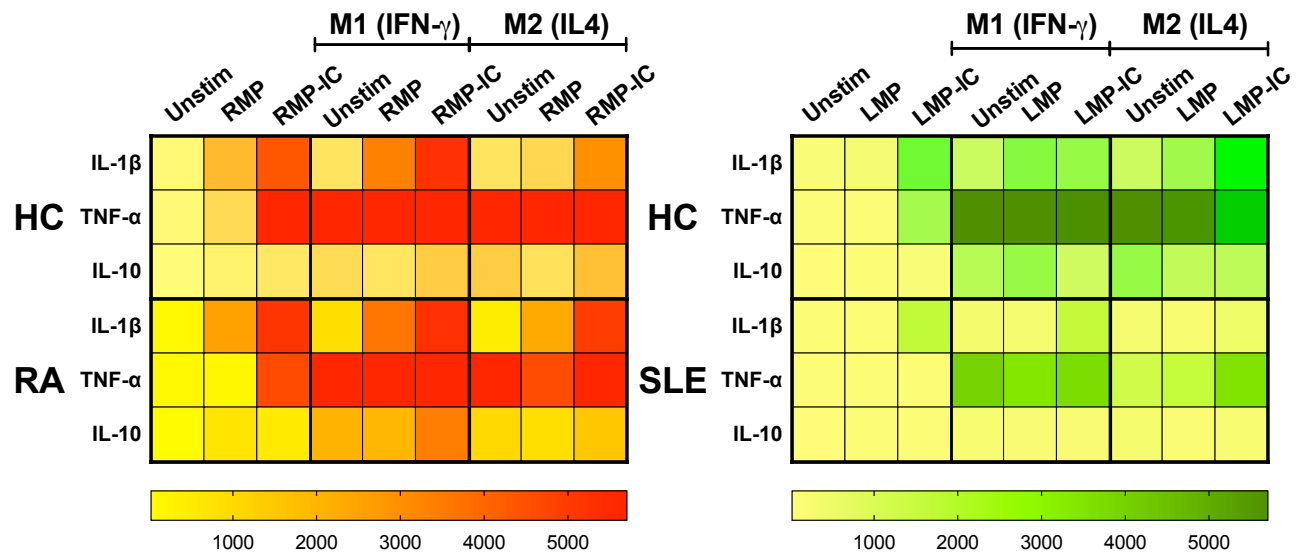

**Supplementary Figure 5. RMP-ICs induce a more prominent differentiation to a M1-like profile than LMP-ICs in MDMs from HCs and patients with RA.** A Heat map of median values of cytokine levels in the supernatants of MDMs from patients with RA and SLE and HCs that were differentiated without or with MPs or MP-ICs along with 6 h of IFN- $\gamma$  or IL-4 treatment.
